# Supplementary material for: Three Dimensional Quantitative Structure-Activity Relationship of 5H-Pyrido[4,3-b]indol-4-carboxamide JAK2 Inhibitors
Source: Int J Mol Sci. 2013 Jun 5;14(6):12037–53. doi: 10.3390/ijms140612037 (PMC3709772; doi:10.3390/ijms140612037)
Supplement: Supplementary file 1 [file ijms-14-12037-s001.pdf]

## Supplementary Information

**Scheme 1.** The synthesis of representative compound D2. Compound D2 was synthesized from Fischer indole which was synthesized between 2,4-dihydropyridine and 3,5-difluorophenylhydrazine hydrochloride.

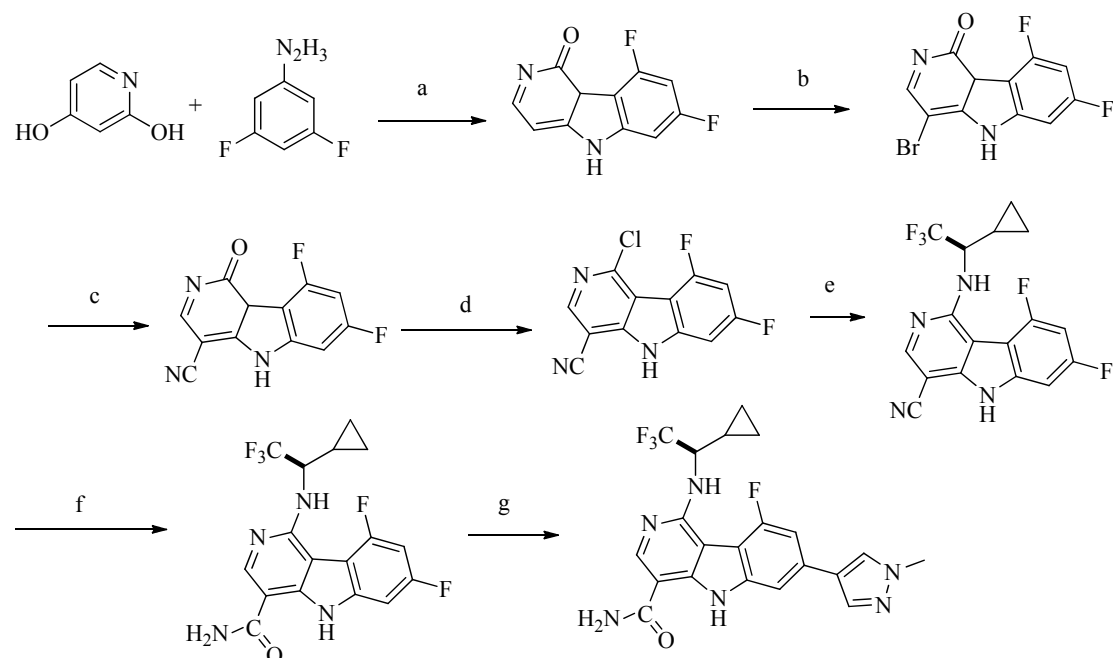

(a) Dean-Stark trap,  $\text{Ph}_2\text{O}$ ; (b) NBS, DMF; (c)  $\text{Zn}(\text{CN})_2$ ,  $\text{Pd}(\text{PPh}_3)_4$ , DMF; (d)  $\text{POCl}_3$ ; (e) (1R)-1-cyclopropyl-2,2,2-trifluoroethanaminium chloride,  $\text{Pd}_2(\text{dba})_3$ , BINAP,  $\text{NaO}^t\text{Bu}$ , DME; (f) Aqueous  $\text{H}_2\text{O}_2$ ,  $\text{K}_2\text{CO}_3$ , DMSO; (g) 1-methyl-4-(4,4,5,5-tetra-methyl-1,3,2-dioxaborolan-2-yl)-1H-pyrazole,  $\text{Pd}_2(\text{dba})_3$ ,  $\text{PCy}_3$ ,  $\text{K}_3\text{PO}_4$ .

MS(ESI) 447.4,  $^1\text{H}$ -NMR (400MHz,  $\text{DMSO-d}_6$ )  $\delta$  0.27–0.34 (m, 1H), 0.47–0.53 (m, 1H), 0.58–0.62 (m, 1H), 0.68–0.75 (m, 1H), 1.73–1.79 (m, 1H), 3.95 (s, 3H), 4.80–4.88 (m, 1H), 6.90 (d,  $J = 8.8$  Hz, 1H), 7.25 (br, s, 1H), 7.44 (s, 1H), 7.80 (s, 1H), 7.85 (s, 1H), 7.89 (br, s, 1H), 8.09 (s, 1H), 8.44 (s, 1H), 11.50 (s, 1H).

$\text{IC}_{50}$  values for inhibitors of JAK2 were determined using HTRF detection technology. 20 pM JAK2 was incubated in 50 mM Tris, 5 mM  $\text{MgCl}_2$ , 100 mM NaCl, 0.1 mg/mL BSA, 2 mM DTT, 5  $\mu\text{M}$  ATP and 2  $\mu\text{M}$  amino hexanoyl biotin-EQEDEPGDYFEWLE-NH<sub>2</sub> for 60 min at ambient temperature. Inhibitors were tested at a final concentration of 5% DMSO.

© 2013 by the authors; licensee MDPI, Basel, Switzerland. This article is an open access article distributed under the terms and conditions of the Creative Commons Attribution license (<http://creativecommons.org/licenses/by/3.0/>).
